# Supplementary material for: Circulating Immune Landscape Profiling in Psoriasis Vulgaris and Psoriatic Arthritis by Mass Cytometry
Source: Hindawi journal article supplement (doi:10.1155/2024/9927964), 2024-01-01
Supplement: f2 [file 9927964.f2.pdf]

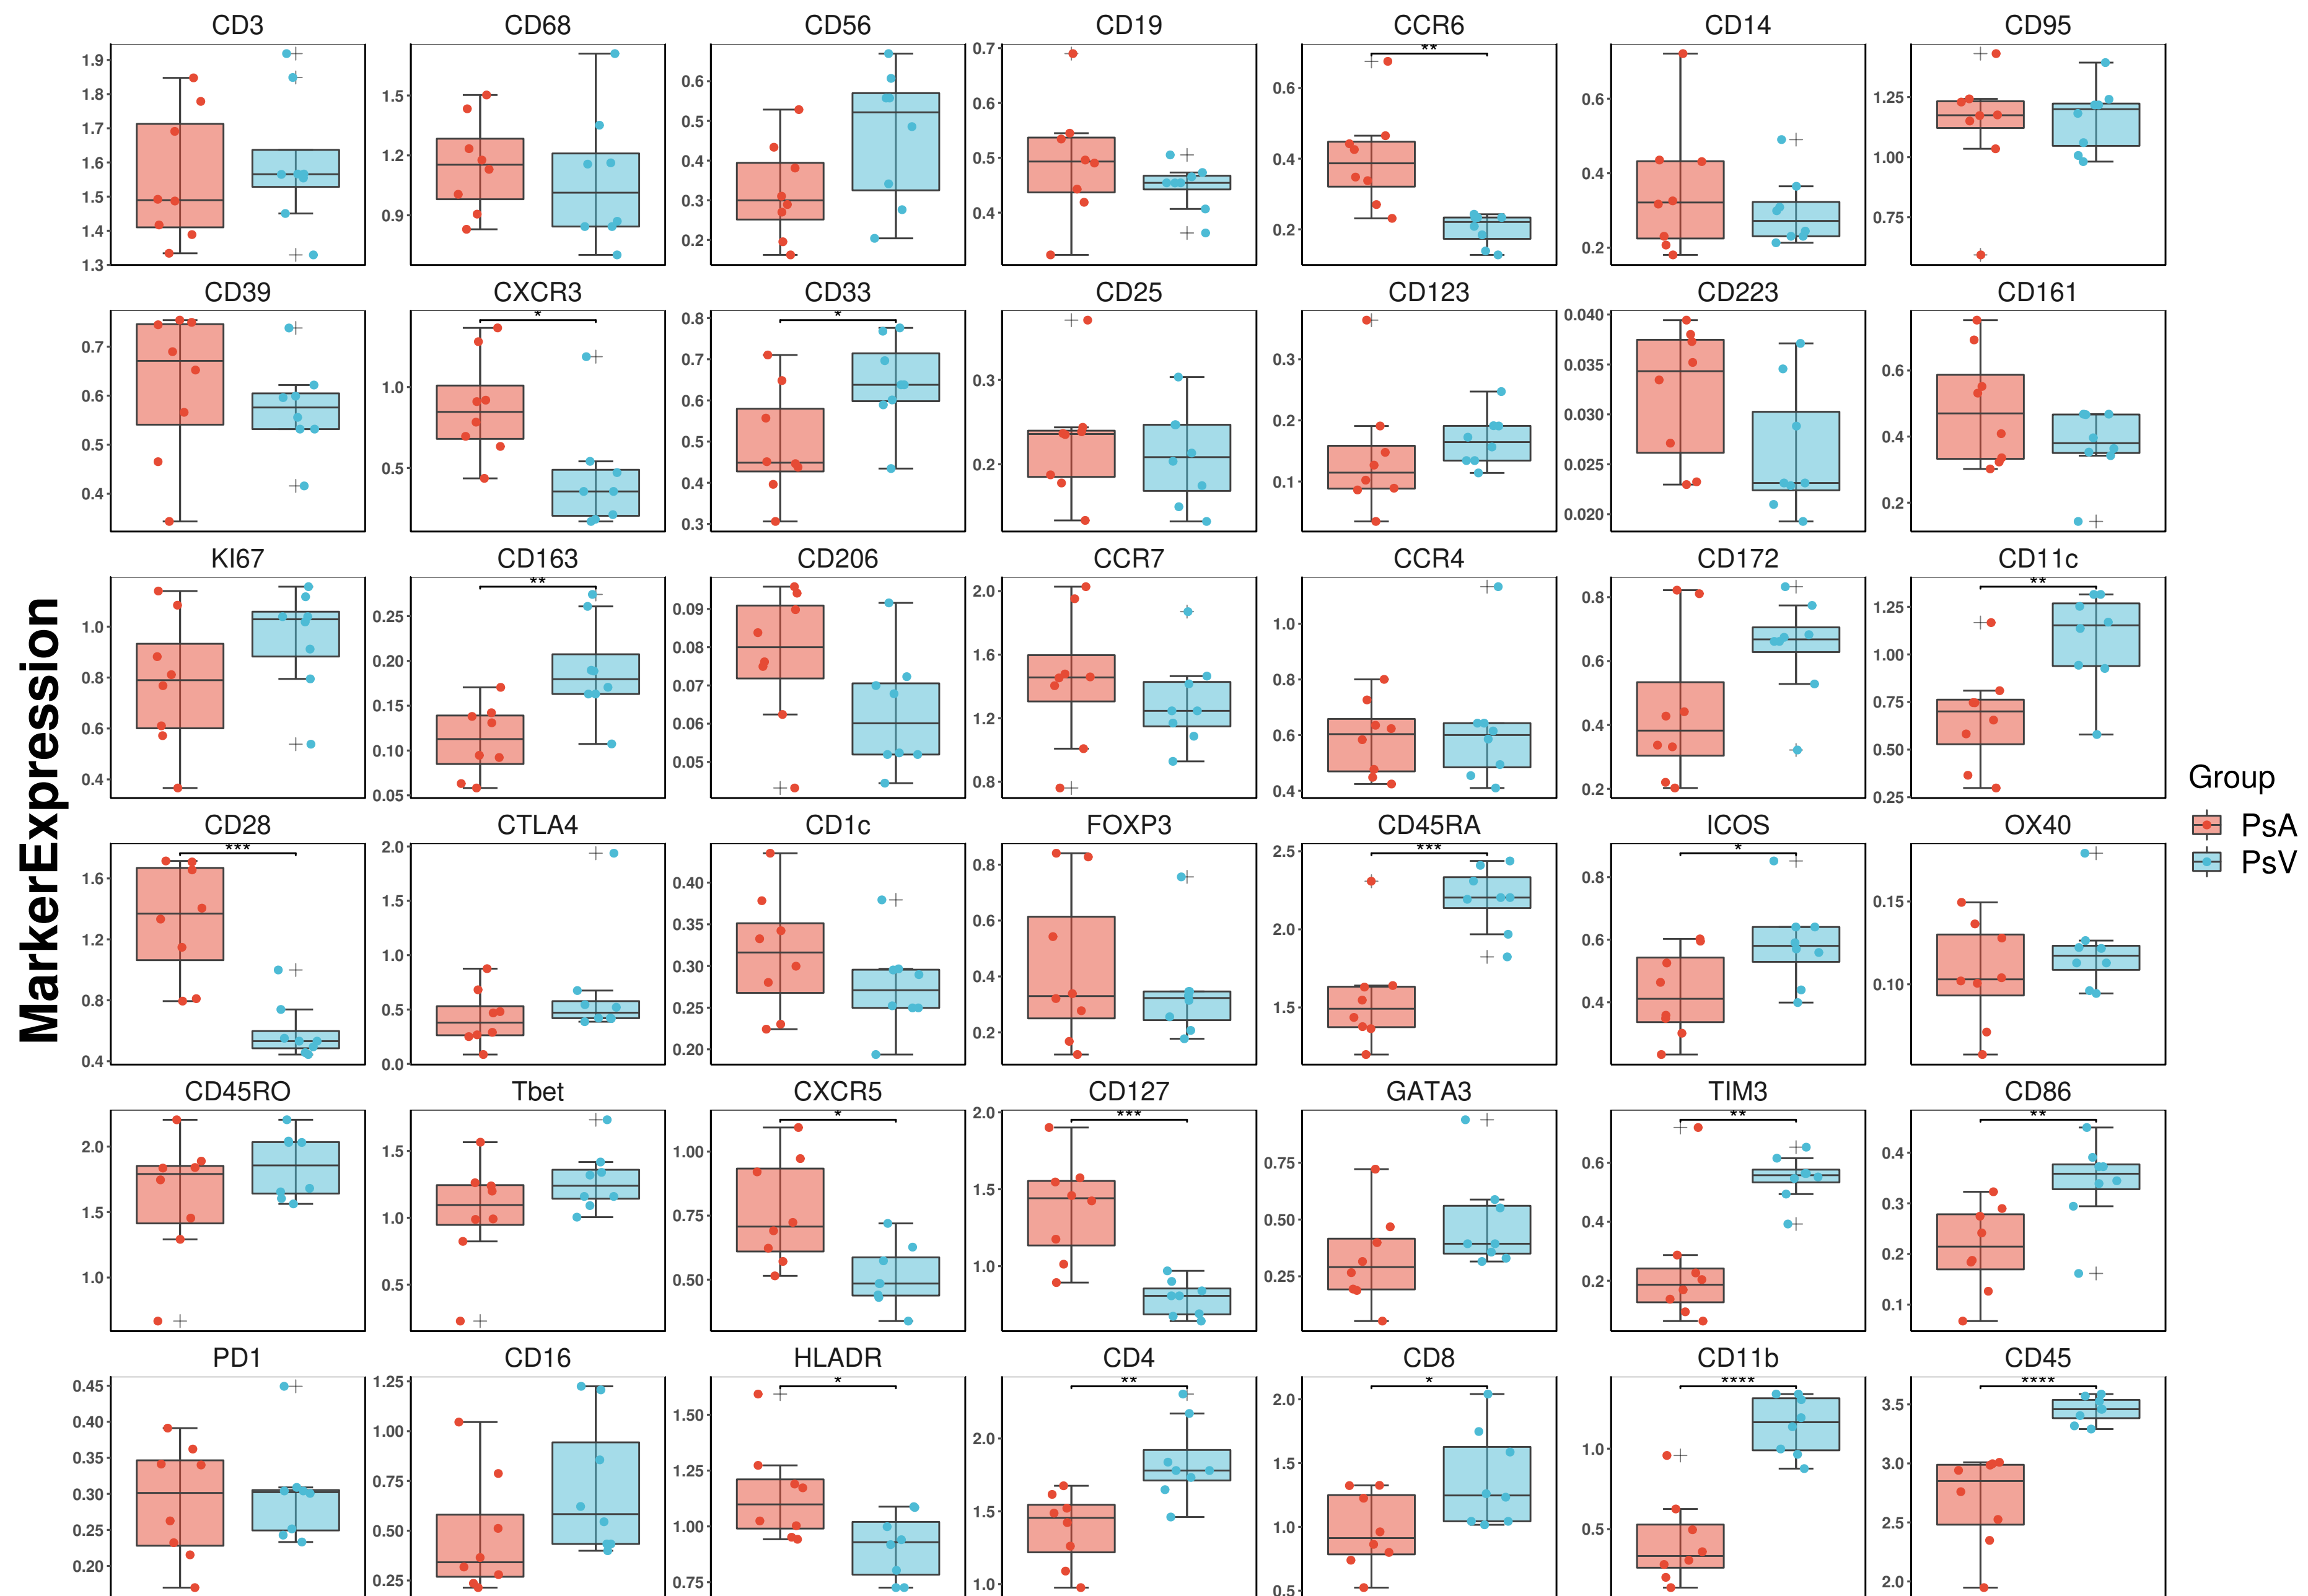

**Supplementary Fig. 1 Comparisons of markers expression levels between PsA and PsV.**

p values were calculated using two-sided unpaired t-test or Mann-Whitney U test according to data distribution (\* =  $p < 0.05$ , \*\* =  $p < 0.01$ , \*\*\* =  $p < 0.001$ ).
